# Supplementary material for: Continuous Glucose Monitoring in People With Type 1 Diabetes on Multiple-Dose Injection Therapy: The Relationship Between Glycemic Control and Hypoglycemia
Source: Oxford University Press journal article supplement (doi:10.2337/dc19-0977), 2019-09-17

SUPPLEMENTARY DATA

**Supplementary Figure S1.** Relationships between %time spent below 70mg/dL (3.9mmol/L) and mean glucose and HbA1c at baseline

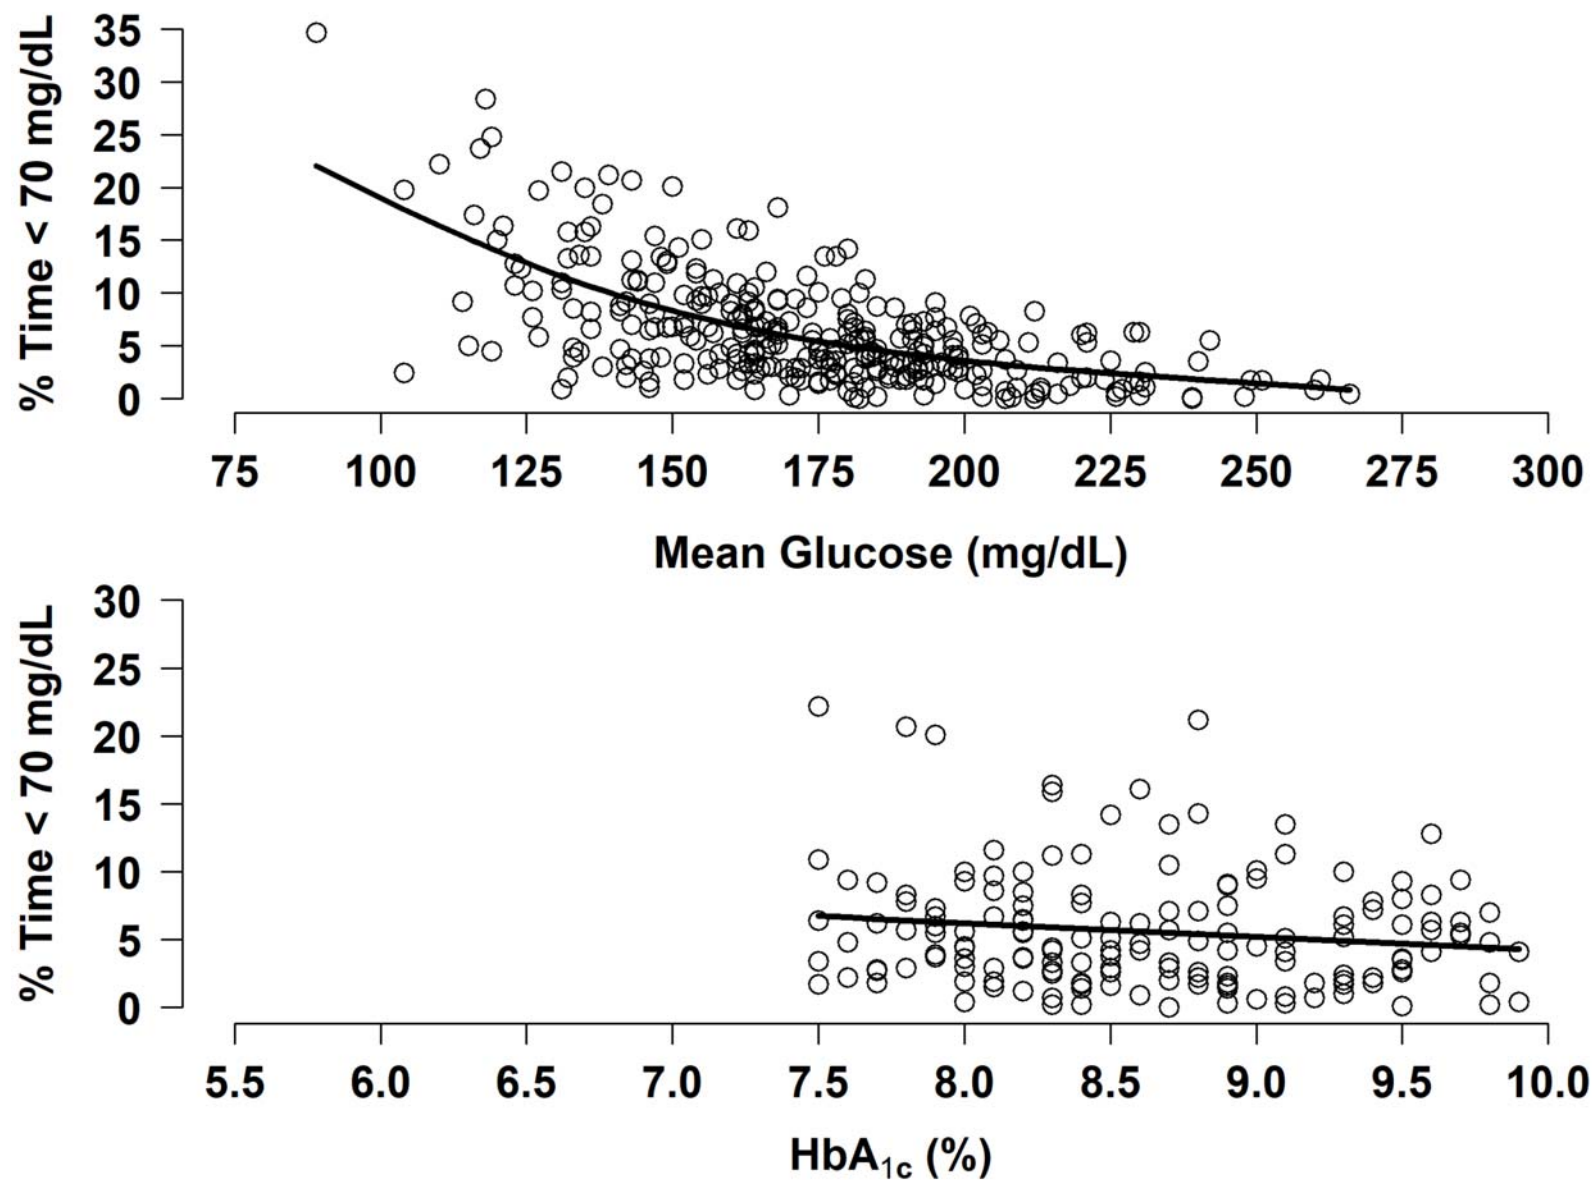

SUPPLEMENTARY DATA

**Supplementary Figure S2.** Relationships between %time spent below 70mg/dL (3.9mmol/L) and mean glucose and HbA1c at the endpoint in the SMBG group

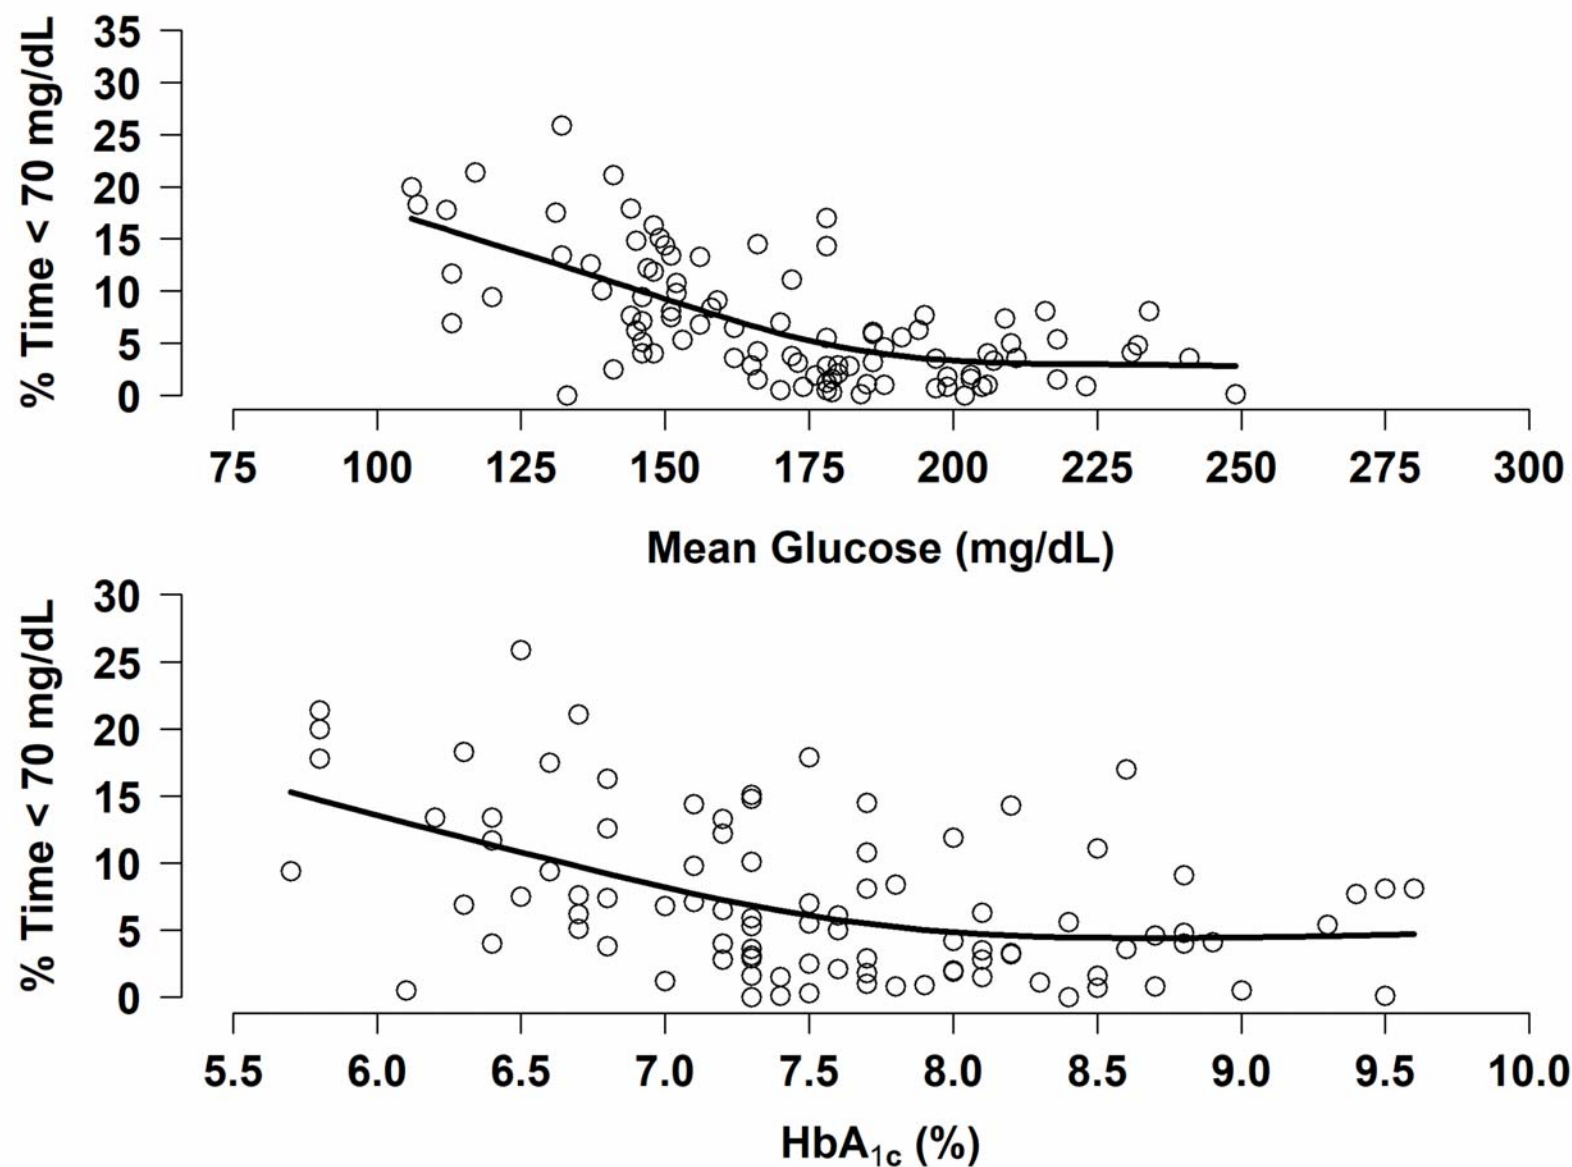

SUPPLEMENTARY DATA

**Supplementary Figure S3.** Relationships between %time spent below 70mg/dL (3.9mmol/L) and mean glucose and HbA1c at the endpoint in the rtCGM group

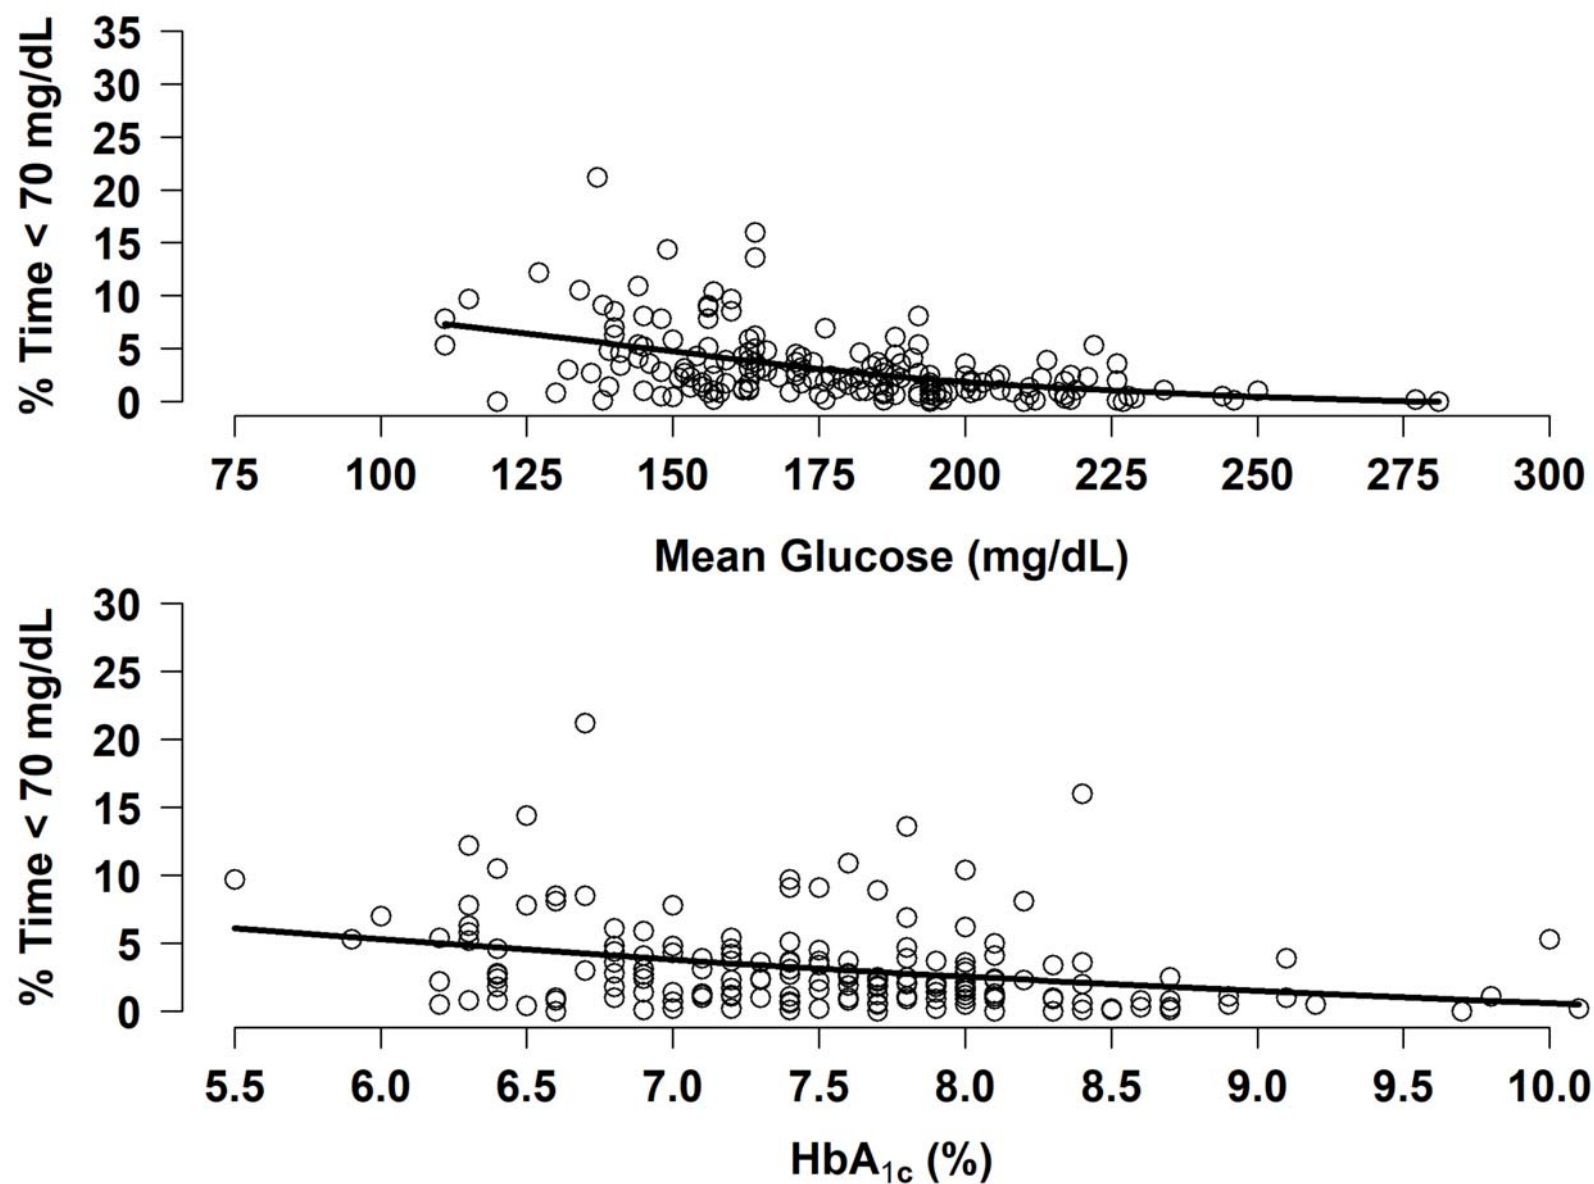

Supplement: dc190977supplementarydata.pdf [file dc190977supplementarydata.pdf]
